# Feeling at home in a virtually amputated body; Neural and phenomenological effects of illusory embodiment of the desired body in Body Integrity Dysphoria

Gianluca Saetta<sup>1,2\*</sup>, Yannik Peter<sup>2</sup>, Kathy Ruddy<sup>3</sup>, Jasmine T. Ho<sup>2,4</sup>, Roger Luechinger<sup>5</sup>  
Lars Michels<sup>6,7</sup> & Bigna Lenggenhager<sup>2,8</sup>

<sup>1</sup> Professorship for Social Brain Sciences, Department of Humanities, Social and Political Sciences, ETH Zurich, Switzerland

<sup>2</sup> Department of Psychology, University of Zurich, Binzmühlestrasse 14, 8050 Zürich, Switzerland

<sup>3</sup> School of Psychology, Queen's University Belfast, Belfast, Northern Ireland, UK

<sup>4</sup> Department of Psychiatry, Psychotherapy, and Psychosomatics, Psychiatric University Hospital Zurich, Zurich, Switzerland

<sup>5</sup> Institute for Biomedical Engineering, University Zurich and ETH Zurich, Zurich, Switzerland

<sup>6</sup> Department for Neuroradiology, Clinical Neuroscience Center, University Hospital Zurich, Zurich, Switzerland

<sup>7</sup> Neuroscience Center Zurich, University of Zurich and Swiss Federal Institute of Technology Zurich, Zurich, Switzerland.

<sup>8</sup> AIR – Association for Independent Research, Zurich, Switzerland

\*Corresponding author:

Dr. Gianluca Saetta

ETH Zurich

Professorship for Social Brain Sciences (SBS)

Stampfenbachstrasse 69, STB G 13.1

CH-8092 Zurich

[gianluca.saetta@gmail.com](mailto:gianluca.saetta@gmail.com)

[www.sbs.ethz.ch](http://www.sbs.ethz.ch)

**Keywords:** Virtual Reality, MRI, Body Integrity Dysphoria, Right Superior Parietal Lobule, Embodiment

**NOTE:** This preprint reports new research that has not been certified by peer review and should not be used to guide clinical practice.

## Abstract

Body Integrity Dysphoria (BID) is characterized by a profound incongruity between the physical body and a desired, i.e., amputated body, often leading to a desire for limb amputation. Virtual reality (VR) intervention and multisensory stimulation paradigms provide powerful tools to enable transient, illusory embodiment of the desired body, thus experiencing a virtual amputation.

This study investigates the impact of VR on neural responses in 18 individuals with BID compared to 18 age and sex matched healthy controls. We used both task-based and resting-state MRI to assess activity when viewing images of the body in the desired *versus* the undesired state before and after VR, along with functional connectivity measures. In VR, participants played a game with an amputated body, which was adapted for the BID group to simulate their desired bodily shape, seen from a first-person perspective and mimicking the participant's leg movements.

Compared to controls, individuals with BID demonstrated a stronger self-reported sense of ownership and control over the virtual body. Task-based fMRI results showed increased activity in the right superior parietal lobule (rSPL), right angular gyrus, and right supplementary motor area pre-VR in the BID group, which normalized post-VR. Resting-state fMRI revealed reduced connectivity in the rSPL, visuo-occipital areas, fronto-parietal, and fronto-striatal mirror and limb system networks pre-VR, also normalising post-VR. Additionally, there was a normalization in the pattern of increased connectivity of dopaminergic cortico-striatal tracts connecting the rSPL and the pars orbitalis of the right inferior frontal gyrus with the nucleus accumbens.

Our findings suggest that virtual embodiment effectively modulates BID-related neural networks, potentially providing a controlled, cost-effective, and safe approach to address body dissatisfaction. They also underscore the significance of VR in unravelling the intricate relationship between the body and self, with potential implications for other psychiatric disorders of the bodily self.

## Introduction

The conventional neuroscientific and psychological understanding suggests that self-awareness develops and settles within our bodily boundaries, which are defined by the structural and functional frame of bones and tissues. Most individuals experience a profound resonance between what lays within their bodily boundaries and their body image, a conscious representation of body size and shape typically encompassing bilaterally symmetrical lower and upper limbs, enabling a spectrum of locomotor and manipulative actions (Longo, 2020, 2015). Scientists have long been fascinated by the observation that within these bodily boundaries, specific body parts or functions may elicit a sense of incongruity, diverging from the usual body image.

One such phenomenon, referred to as "Body Integrity Dysphoria" (BID), spans a varied spectrum of conditions unified by the common symptom of profound discontentment regarding their bodily configuration or functionality. In the context of the most extensively investigated form of BID and the variant that presents the focus of this paper, this profound discontent often leads to an intense and persistent longing for limb amputation—an urge that starkly contrasts with the limb's intact anatomy and functions. In BID the body image is thought to be characterized by the absence of a limb, and the desired amputation is perceived as a means to align the physical body to the phenomenological (i.e. the felt) body image, paradoxically fostering a sense of completeness (First, 2005). Previous neuroimaging findings highlight preserved primary sensorimotor and visual processing of the affected limb in BID, combined with atypical structures and functions of the right superior parietal lobule (rSPL) (Hilti et al., 2013; McGeoch et al., 2011, see also review in Fornaro et al., 2021). Serving as a crucial neural substrate for the body image, the rSPL not only exhibits diminished whole-brain functional connectivity and reduced gray matter but also displays diminished structural connectivity with the visual parieto-occipital area in individuals with BID compared to healthy able-bodied individuals. This might reinforce a disparity between the rSPL-represented missing limb body image and the visually perceived "fully-limbed body" (Saetta et al., 2022, 2020).

While far from being fully understood, BID is considered a complex condition arising from interacting neurological, psychological, and social factors (Brugger et al., 2013). BID has been increasingly researched in recent years and has finally been formally acknowledged in the 11th Revision of the International Classification of Diseases (ICD-11) as a "disorder of bodily distress or bodily experience (F6C21), among the developmental disorders." The diagnostic criteria for BID include: i) the persistence of a distressing desire for limb amputation, ii)

resulting impairments of daily life in social, occupational, or other crucial areas of functioning;  
iii) the exclusion of other explanatory mental disorders or medical conditions.

The impact on the quality of life is especially denoted by the time spent “pretending” (Brugger et al., 2016) – i.e., the simulation of the desired body state by using crutches or wheelchairs, for example. The pretending functions as a temporary coping mechanism to ease the incongruence between the current and desired body state, thereby alleviating associated distress (First and Fisher, 2012).

Nonetheless, though less drastic than physical limb amputation, excessive pretending can result in both short- and long-term adverse effects. These include compromised blood circulation in the affected limb, which might affect the brain by reducing the concentration of gray matter in the rSPL (Saetta et al., 2020). A potential alternative and safer approach could involve the application of brain-computer interfaces (Chakraborty et al., 2021) or embodied virtual or augmented reality (VR/AR). Embodied VR technologies facilitate illusory embodiment of avatars of diverse body shapes or functionalities through altered multisensory stimulation. In this context, embodiment refers to the sense of being localized in a virtual body (self-location), while owning (sense of ownership) and controlling (sense of agency) that body. Previous research has shown that participants can embody avatars of different bodily size (Scarpina et al., 2019), gender (Bolt et al., 2021; Tacikowski et al., 2020) or structure, which might lead to alterations in a broad range of physiological processes as well as in in perceptive, cognitive, emotional, and social processes (Dijkerman and Lenggenhager, 2018). The therapeutic potential of embodied VR for various disorders of the bodily-self have has also been discussed (e.g. Dijkerman and Lenggenhager, 2018). Here, we use embodied VR to enable illusory embodiment of the individual’s desired bodily state by facilitating a “virtual amputation”. Consistent with this idea, a preliminary study with two individuals with BID demonstrated a decrease in BID symptoms through a VR intervention, wherein individuals perceived themselves as an amputated virtual body (Turbyne et al., 2021).

The current study investigates the effect of such a VR intervention on neural and phenomenological measures in a group of 18 Individuals with BID and a sex- and age-matched control group of 18 healthy participants. During the VR intervention, participants engaged in a gaming scenario in an avatar with a customized amputation, meticulously tailored to reflect the desired body. This body was seen from a first-person perspective and leg movements were synchronized with the participant's own movements to enhance the sense of ownership and agency.

We used resting-state functional magnetic imaging (rs-fMRI) and a block-designed task based fMRI to assess neural activity both at rest and while participants viewed pictures of their bodies in the physical full state *versus* the desired amputated state (for a similar approach see Oddo-Sommerfeld et al., 2018), both before and after the VR intervention. For the further assessment of the longer-term effects of our intervention, we gathered clinical data through an online questionnaire over a 7-week timeframe, encompassing the period before and after the VR intervention.

In alignment with their heightened self-identification with an amputated body (Ho et al., 2023; Macaуда et al., 2017), we hypothesize increased ownership and agency for the virtual amputated body during the intervention in the BID group, as measured by a questionnaire.

We expected the VR intervention to transiently normalize neural patterns previously found to be altered in both task-based fMRI (Oddo-Sommerfeld et al., 2018) and structural and functional connectivity studies (Saetta et al., 2022, 2020). In the task-based fMRI tasks, we expected heightened activity in the rSPL when individuals with BID viewed images of themselves in the amputated state compared to the control group (Oddo-Sommerfeld et al., 2018). Furthermore, we anticipated that this difference would diminish following the VR intervention. In the resting-state fMRI, in line with previous studies (Saetta et al., 2022, 2020), we anticipated reduced functional connectivity of rSPL and parieto-occipital visual areas, and altered connectivity of the reward system in BID compared to the control group before the VR intervention. Again, we expected these patterns to normalize after the VR intervention.

Finally, considering the early stage of BID research and the need to enhance our understanding of the condition, we also aimed to replicate previously observed brain structural alterations. Specifically, we sought to replicate prior findings indicating a reduction in gray matter concentration within specific brain regions associated with body image, multisensory integration, and the reward and limbic systems—namely the rSPL, the left premotor cortex, and orbitofrontal cortex (Saetta et al., 2020) in a largely independent cohort of individuals with BID. For additional replication, inspired by Oddo-Sommerfeld et al. (2018), we integrated a task into our study design after the MRI sessions. In this task, participants were required to rate images, either of themselves or others, in both amputated and complete states. Consistent with their findings, we anticipated that individuals with BID would rate images of themselves in the amputated state as more emotionally satisfying, intense, attractive, and sexually arousing.

## Methods

### Participants

The study cohort consisted of 18 Individuals with BID, encompassing 5 women and 13 men (mean age =  $45.83 \pm 14.00$  years). Additionally, a group of 18 healthy age matched (Welch two-sample t-test on age:  $t(35) = -0.52$ ,  $p = 0.61$ ) controls, comprising 4 women and 14 men (mean age =  $47.83 \pm 13.92$  years), was included. One participant from the BID group experienced discomfort during the MRI session and thus provided only the phenomenological data. Ten individuals with BID reported a desire for amputation of their left leg, while 8 desired amputations of their right leg. Two participants had already participated in a previous neuroimaging study (Saetta et al., 2020; Saetta et al., 2022).

Five Individuals with BID but none of the healthy controls reported Gender Identity Dysphoria (3 biologically male identifying as female (i.e., male-to-female transgender), one biologically female identifying as male (i.e., female-to-male transgender), and one biologically male who previously did a gender reassignment surgery, which is in line with previous literature showing a comorbidities between the two conditions (Scupin et al., 2021). Individuals with BID were recruited through mailing lists, online self-help groups and personal contacts. As BID is a relatively rare condition, these individuals were recruited from different countries (Germany:  $n = 7$ ; Switzerland:  $n = 5$ ; USA:  $n = 2$ ; UK:  $n = 2$ ; Netherlands:  $n = 1$ ; Austria:  $n = 1$ ).

The evaluation of BID diagnostic criteria was performed by trained psychologists according to the inclusion criteria provided by the ICD-11. Furthermore, the intensity of the desire for amputation was assessed through the Zurich Xenomelia Scale (Aoyama et al., 2012). This scale, consisting of 12 statements, required participants to rate their agreement on a six-point Likert scale, ranging from 1 (strongly disagree) to 6 (strongly agree). The scale is structured into three subscales: "amputation desire" (focused on identity restoration as the primary motivation for amputation), "erotic attraction" (examining sexual arousal towards amputated bodies), and "pretending" (evaluating the inclination to mimic individuals with amputation). Scores for each subscale are derived from the sum of four item scores, with potential scores ranging from 4 (not intense) to 24 (most intense). Control participants were recruited through a research participants database from the University of Zurich and through mailing lists.

The eligibility criteria for inclusion encompassed: (i) age range (18-65 years), (ii) provided informed consent, (ii) gender diversity (male, female, non-binary), and self-reported BID with a desire for limb amputation (for the BID group, or lack of it for the control group). Exclusion criteria were: (i) presence of major psychiatric or neurological disorders beyond BID, including

depression and anxiety; (ii) indications of non-compliance with study protocols; (iii) evidence of drug or alcohol abuse, as determined through reliance on self-report measures, (iv) inability to adhere to study procedures due to language barriers or underlying psychological conditions; (v) identification of contraindications for MRI examinations based on questionnaire screening. The study was approved by the local Ethics Committee of the University Hospital of Zurich (EK-BASEC: ID 2021-01867) and was run in compliance with the guidance provided in the Declaration of Helsinki (1964).

## **Study Procedure**

To assess the clinical features of a desired amputation in BID and their potential modification through the embodied VR interventions, individuals with BID engaged in an online survey administered via the Psytoolkit software (Stoet, 2010) before and after the main study. Each survey had an approximate duration of 10 minutes. On the day of testing, both groups were subjected to the following MRI scans, which were repeated before and after the VR-intervention: structural MRI scans, rs-fMRI, and task-based fMRI. Furthermore, in the post-VR intervention session, Diffusion Tensor Imaging (DTI) data, to be discussed in a separate contribution, were collected. Data collection took place at the Institute of Biomedicine (ETH Zurich). After each MRI session, participants were requested to rate the images they had encountered during the active task fMRI.

The sequence of task administration followed this order: (i) acquisition of T1-weighted morphological data (pre-VR, approximately 3 minutes); (ii) rs-fMRI (pre-VR, approximately 8 minutes); (iii) task-based fMRI (pre-VR, approximately 25 minutes); (iv) picture ratings outside the scanner (pre-VR, approximately 10 minutes); (v) break (approximately 30 minutes); (vi) VR experience (approximately 30 minutes); (vii) rs-fMRI (post-VR, approximately 8 minutes); (viii) task-based fMRI (post-VR, approximately 25 minutes); (ix) DTI data collection (approximately 20 minutes); (iv) picture ratings outside the scanner (post-VR, approximately 10 minutes).

## **Data Collection and Analysis**

While raw data will be made available in a separate data descriptor contribution, processed behavioral data and relative scripts as well as the MATLAB (spm.mat) file to explore the neuroimaging findings are available on Open Science Framework (OSF - <https://osf.io/qag6u/>)

## **Virtual embodiment**

A head-mounted display (HMD, Oculus Rift S) was used for the visual stimulation in VR. The Oculus Rift S employs a rapid-switch LCD panel with a display resolution of 1280×1440 pixels per eye, operating at an 80 Hz refresh rate. To facilitate tracking of head and controller positions, the integrated cameras of the Oculus Rift S were utilized. This tracking data was integrated into Unity Version 2020.3.12f1 to animate avatars crafted using the open-source tool MakeHuman. Subsequent avatar refinement took place in Blender Version 2.93.11, creating a series of avatars with customized amputations at locations defined by participants. The avatars thus matched the desired amputation both in terms of size and height for the individuals with BID. Healthy controls, matched for age, gender, height, and side of amputation with the individuals with BID, underwent the same virtual amputation procedure as their respective BID counterparts.

Given the three-point tracking data supplied by the Oculus Rift S (head, left controller, right controller), animations were required to simulate leg movements. In this regard, inverse kinematics were applied using the Animation Rigging Toolbox Version 1.0.3, coupled with positional tracking data from the two controllers, with one attached to each of the participants' feet.

During the VR stimulation, participants were instructed to sit on an examination table, allowing their legs to hang off one side. The HMD was worn, with controllers attached to the feet. Subsequently, the virtual avatar's position and dimensions were adjusted within the VR environment until participants perceived a natural appearance and size. Manual adjustments were made to the hip position, as required, based on participant posture. Additionally, slight size adjustments were made for participants with differing leg lengths. In this way participants embodied a virtual avatar with a leg amputation from a first-person perspective with individually defined line of demarcation between accepted and rejected body segment. For the affected leg, a stump was visible (see Fig. 1, i.e., in the desired state for BID but the undesired state in controls; videos are available on OSF (<https://osf.io/qag6u/>)).



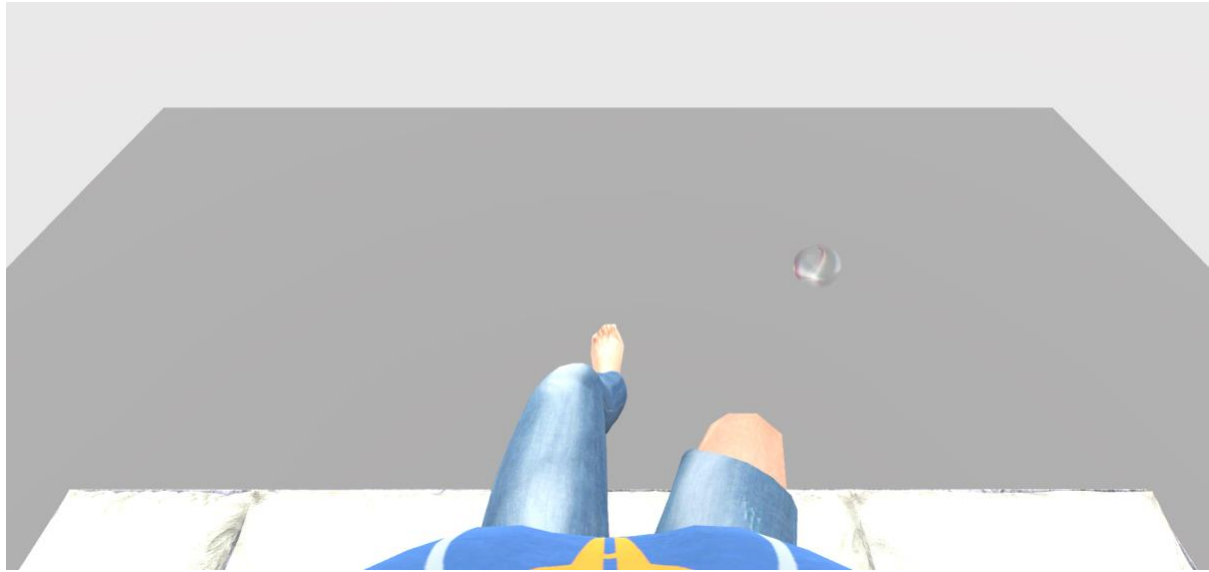

**Figure 1.** View of the virtual body in a first-person perspective, reflecting the desired state for Individuals with BID. Leg movements were tracked and synchronously displayed on the avatar. The participant's task was either to explore their body or to catch the soap bubbles with the virtual stump (shown here)

The stimulation protocol encompassed eight rounds, each lasting 120 seconds. Participants were directed to engage in one of two tasks during a round: either exploring the avatar by observing and moving its legs or participating in a game involving popping soap bubbles with the virtual stump. The sequence alternated between exploration and gameplay, repeated four times for a total of eight rounds, requiring 16 minutes in total.

Following the completion of these rounds, participants were presented with a seven item questionnaire on the embodiment (in English or German), assessed through a visual analogue scale (VAS) graded from 0 to 100 (0 = not at all, 100 = very strong). Participants utilized head movement to control a cursor, indicating their responses on a displayed bar. They never saw the value/score they selected as they pointed at a location on the bar. The seven questions were categorized into five conditions: *Affected Leg Disownership (concerning the physical body)*: “How strong is the feeling that the affected leg is not yours?”; *Virtual Body Ownership*: “How strong is the feeling that the virtual body is your body? - “; *Virtual Body Agency*: “How strong is the feeling that the movements that the virtual body makes are your movements?”; then *Virtual Leg Ownership* and the *Virtual Leg Agency* was inquired separately for the left and right legs as follow: “How strong is the feeling that the left/right leg is your left/right leg” and “How strong is the feeling that the movements that the virtual left/right leg makes are your movements”.

At the end of the VR experience, in the debriefing before commencing the MRI session post VR, individuals with BID were explicitly asked whether they experienced an amplified desire for amputation.

Data analyses were performed with R Studio v. 1.3.1093, and packages coin and ARTool. Alpha level set to 0.05, or 95% confidence intervals. Data were tested for normality using a Shapiro-Wilk-Normality-Test and visual inspection of the residuals of histograms and QQ-plots, and analysed correspondingly with non-parametric tests. Wilcoxon rank sum tests were employed to investigate differences in VAS scores between the BID and control groups for *Virtual Body Ownership*, *Virtual Body Agency* and *Affected Limb Disownership*.

For *Virtual Leg Ownership* and *Virtual Leg Agency* we coded the 2-level factor *Virtual Amputation* which defined whether the left or the right leg was virtually amputated. We then calculated a non-parametric ANOVA (i.e. ART-ANOVA, Wobbrock et al., 2011) considering the between-factor *Group* (BID/Control), the within-factor *Consistency Amputation* (consistent/non-consistent) and their interaction. The model tested across all the analyses was the following:

$$VAS\ score = intercept + \beta_1 (Group) + \beta_2 (Virtual\ Amputation) + \beta_3 (Group\ by\ Virtual\ Amputation) + e$$

where “ $\beta_x$ ” stands for the estimated parameters, and “ $e$ ” stands for the residuals. Post-hoc tests were performed using the “art.con” function.

## **Task-based fMRI**

The fMRI experiment employed a block-designed approach with four functional runs, closely following the parameters and task design outlined in the experimental framework by Oddo-Sommerfeld et al. (2018). The stimulus set featured participant images, edited using GIMP software to represent the participants in their desired body state (e.g., with a leg amputation for the BID group) and their physical state (complete and non-amputated for the BID group), presented from front and back angles. Four distinct stimulus categories were defined: “Self vs Other” and “Full vs Amputated Body.” In the “Other” category, individuals were matched in age and sex to the individuals with BID, and their legs were digitally removed to simulate the desired limb amputation characteristic of BID.

Each condition included eight stimuli, presented three times, totalling 24 trials. Rest intervals lasting 9-12 seconds, with an average jittered mean of 10.5 seconds interspersed these trials.

Participants were instructed to attentively observe the presented images and register any emotional responses, following the methodology described previously (Oddo-Sommerfeld et al., 2018). Serving as an attentional control task, each run concluded with images of a green square ( $n = 5$ ) or a pink square ( $n = 5$ ). Participants promptly responded by pressing a handheld button using either their index or middle finger, corresponding to one of the squares. Analysis and results will be presented in a separate data descriptor paper.

Participants were scanned using a 3.0 Tesla Philips Ingenia whole-body scanner (Philips Medical Systems, Best, The Netherlands). This scanner had a transmit-receive body coil and a commercially available 32-element head coil array. For the task based fMRI protocol the Field of View (FOV) was 220mmx220mm, and the acquisition voxel size was 3.1mmx3.0mm. Thirty-five slices with a thickness of 3.0mm and a slice gap of 0.5mm were acquired. A sense factor of 1.5 was used. The scan duration consisted of 7 repetitions, each lasting 428 seconds. The repetition time and echo time were set at 2300ms and 35ms.

Data pre-processing and single-subject analysis were conducted using MATLAB (version 2016B) in conjunction with the SPM12 toolbox. A pre-processing pipeline was built up in R studio and the packages “spm12r” und “matlabr” was used to call SPM12 function in R studio. The script is available on OSF (<https://osf.io/qag6u/>). The pre-processing steps followed a standard procedure. Addressing motion-induced artifacts, motion realignment was performed, ensuring alignment across time points by registering functional MRI data to a reference image. To refine temporal alignment, slice-timing correction was applied. The anatomical reorientation and coregistration steps established anatomical-functional congruence. The anatomical MRI image was reoriented to a standardized orientation and subsequently coregistered to the mean functional MRI image. Subsequent anatomical MRI segmentation identified tissue types, while spatial normalization parameters were estimated to align the anatomical image to a common template. The data matrix was interpolated to yield 2 x 2 x 2 mm voxels. Further refining anatomical data, the segmentation isolated distinct tissue types, while spatial normalization, informed by the previous step, aligned the functional images. Spatial smoothing enhanced data quality by convolving functional MRI data with a 5x5x5 Gaussian filter, improving the signal-to-noise ratio.

Following preprocessing, the canonical hemodynamic response function (HRF) was employed to characterize the Blood-oxygen-level-dependent (BOLD) signal associated with each block relative to its baseline condition. This modeling enabled the identification of task-related neural activations. Artifacts originating from physiological noise, such as cardiac and respiratory cycles, were attenuated using high-pass filtering with a cutoff of 128 seconds. This filtering effectively removed low-frequency noise components from the data. To account for motion-related variability, the six motion parameters derived from each run were included as regressors in the analysis. This step aimed to control for any confounding effects introduced by head translations and rotations. A fixed-effects analysis was then conducted for each subject to characterize the BOLD response associated with each block of the picture, relative to its baseline condition. The contrast images obtained from the fixed-effects analysis were then entered into a random-effects second-level group analysis. A full factorial analysis was performed, considering the factors of *Group* (BID vs Controls), *Session* (Pre vs Post VR), and *Body State* (Full vs Amputated). The design matrix consisted of 8 columns disposed in the following order: (i) bid-preVR-full, (ii) bid-preVR-amputated, (iii) bid-postVR-full, (iv) bid-postVR-amputated, (v) control-preVR-full, (vi) control-preVR-amputated, (vii) control-postVR-full, (viii) control-postVR-amputated. Importantly, whole-brain analysis without masking was applied. We exclusively report predefined hypothesized effects by applying the most conservative thresholding method available in SPM ( $p < 0.05$  family-wise (FEW) voxel-wise corrected) coupled with a cluster-extent threshold of  $k > 25$  to further exclude spurious activations.

### **Rs-fMRI data**

We also collected rs-fMRI spin-echo echo-planar imaging (EPI) scans. Participants were instructed to relax while staring at a fixation cross displayed on a screen, allowing their minds to wander. The rs-fMRI protocol involved a FOV of 221mmx221mm, with an acquisition voxel size of 2.9mmx3.0mm. 34 slices with a thickness of 3.0mm and a slice gap of 0.5mm were acquired. The sense factor for parallel imaging was set to 1.5. The scan duration was 496 seconds, and the repetition time and echo time values were 2300ms and 35ms. To minimize head motion, cushions were placed around the head. A full list of the parameters are reported in a separate data descriptor paper.

MATLAB (version 2016b, MathWorks, Natick, MA, USA) and CONN connectivity Toolbox version 22b (Whitfield-Gabrieli & Nieto-Castanon, 2012) were utilized for pre-processing and

subsequent analyses. Functional and anatomical data were pre-processed using a flexible pre-processing pipeline (Morfini et al., 2023) including realignment with correction of susceptibility distortion interactions, slice timing correction, outlier detection, direct segmentation and normalization (to the Montreal Neurological Institute (MNI) brain template), and spatial smoothing. Functional data were realigned using SPM realign & unwarp procedure, where all scans were coregistered to a reference image (first scan of the first session) using a least squares approach and a 6 parameter (rigid body) transformation and resampled using b-spline interpolation to correct for motion and magnetic susceptibility interactions. Temporal misalignment between different slices of the functional data was corrected following SPM slice-timing correction (STC) procedure, using sinc temporal interpolation to resample each slice BOLD timeseries to a common mid-acquisition time. Potential outlier scans were identified using the artifact detection tool (ART) as acquisitions with framewise displacement above 0.9 mm or global BOLD signal changes above 5 standard deviations, and a reference BOLD image was computed for each subject by averaging all scans excluding outliers. Functional and anatomical data were normalized into standard MNI space, segmented into gray matter, white matter, and CSF tissue classes, and resampled to 2 mm isotropic voxels following a direct normalization procedure using SPM unified segmentation and normalization algorithm with the default IXI-549 tissue probability map template. Last, functional data were smoothed using spatial convolution with a Gaussian kernel of 8 mm full width half maximum.

In addition, functional data were denoised using a standard denoising pipeline including the regression of potential confounding effects characterized by white matter time series (5 CompCor noise components), CSF timeseries (5 CompCor noise components), and linear trends (2 factors) within each functional run. Next, a bandpass frequency filtering of the BOLD timeseries was applied between 0.008 Hz and 0.09 Hz. CompCor noise components within white matter and CSF were estimated by computing the average BOLD signal as well as the largest principal components orthogonal to the BOLD average within each subject's eroded segmentation masks.

ROI-to-ROI connectivity matrices were estimated characterizing the functional connectivity between each pair of regions among 28 Harvard-Oxford atlas ROIs (Desikan et al., 2006), with a hypothesis-driven approach (Saetta et al., 2022). The ROIs for the connectivity matrices include the left frontal pole (lFP), right frontal pole (rFP), right frontal orbital cortex (rFOrb), left frontal orbital cortex (lFOrb), right inferior frontal gyrus, pars triangularis (rIFGtri), left inferior frontal gyrus (lIFG), pars triangularis (lIFGtri), right inferior frontal gyrus, pars

opercularis (rIFGoper), left inferior frontal gyrus, pars opercularis (lIFGoper), right precentral gyrus (rPreCG), left precentral gyrus (lPreCG), left middle frontal gyrus (lMidFG), left postcentral gyrus (lPostCG), rSPL, right angular gyrus (rAG), right lateral occipital cortex, superior division (rsLOC), right cuneus (rCuneal), posterior cingulate gyrus (PC), right middle temporal gyrus, anterior division (rMTG), right caudate (rCaudate), left caudate (lCaudate), right putamen (rPutamen), left putamen (lPutamen), right accumbens (rAccumbens), left accumbens (lAccumbens), right supplementary motor cortex (rSMA), and left supplementary motor cortex (lSMA).

Functional connectivity strength was estimated separately for each pair of ROIs characterizing the association between their BOLD signal timeseries. Functional connectivity strength was represented by Fisher-transformed bivariate correlation coefficients from a weighted general linear model (weighted-GLM, Nieto-Castanon, 2020), defined separately for each pair of seed and target areas, modelling the association between their BOLD signal time-series.

Individual scans were weighted by a boxcar signal characterizing each condition convolved with an SPM canonical hemodynamic response function and rectified.

Group level analyses were performed using a GLM. For each ROI-to-ROI connection, a separate GLM was estimated, with first-level connectivity measures at this connection as dependent variables and *Group* (BID vs Control) and *Session* (Pre vs Post) as independent variables. Connection-level hypotheses were evaluated using multivariate parametric statistics with random-effects across subjects and sample covariance estimation across multiple measurements. Inferences were performed at the level of individual clusters (groups of similar connections). Cluster-level inferences were based on parametric statistics within- and between- each pair of networks (Functional Network Connectivity , Jafri et al., 2008), with networks identified using a complete-linkage hierarchical clustering procedure) based on ROI-to-ROI anatomical proximity and functional similarity metrics (Benjamini and Hochberg, 1995). Results were thresholded using a  $p < 0.05$  connection-level threshold and a familywise corrected p-FDR  $< 0.05$  cluster-level threshold (Benjamini and Hochberg, 1995).

### **T1-weighted morphological data**

The scanning procedure involved acquiring a high-resolution T1-weighted scan for each participant. For the 3D-T1 imaging protocol, the FOV was 240mmx240mm, with a high-resolution acquisition voxel size of 1x1mm. Thin slices of 1mm thickness were obtained, totalling 160 slices. The sense factor, indicating the level of parallel imaging, was set at 2.5.

The scan duration for this sequence was 242 seconds, and the repetition time and echo time were 8.1ms and 3.7ms, respectively.

The Voxel-Based Morphometry (VBM) technique was utilized to detect variations in gray matter concentration patterns between BID and controls groups. The focus of the analysis was primarily on the regions defined by the “BID VBM mask”, a mask created by merging the ROIs identified as atrophic or hypertrophic in individuals with BID in our preceding study (Saetta et al., 2020). This mask is accessible on OSF (<https://osf.io/qag6u/>).

MATLAB R2016b and Statistical Parametric Mapping (SPM12, Wellcome Trust, UK) were employed for all data pre-processing and subsequent analyses. To ensure adherence to standardized procedures (see Saetta et al., 2020), the established pre-processing batch "preproc\_vbm.m" from the SPM12 toolbox's "batches" directory was executed. Initially, image segmentation was conducted to distinguish between white and gray matter. Subsequently, DARTEL templates were generated to optimize the alignment of images. The transformation of gray matter into the MNI space occurred, and to address distortions introduced by stereotactic normalization, we applied Jacobian modulation.

Further processing included the normalization of Jacobian-scaled gray matter images using pre-estimated deformations. To address spatial variations, a Gaussian Kernel Gaussian Filter ( $8 \times 8 \times 8 \text{ m}^3$ ) was applied for spatial smoothing. The resulting smoothed images were averaged, and an explicit mask was derived by applying a threshold to the tissue average. The normalization process continued with bias-corrected images being aligned to the MNI space. Average normalized bias-corrected maps were then produced and assessed for consistency using SPM12's "Check Reg" tool.

Subsequent to pre-processing, the subject-specific gray matter maps were examined to identify anatomical differences between BID and control groups within anticipated key regions. This analysis involved a two-sample t-test for each voxel within the confines of the BID VBM mask. To account for potential confounding factors, we opted for an ANCOVA approach for correction. This method allowed the identification of group differences in each voxel that were not solely explained by the linear relationship between voxel gray matter content and overall gray matter quantity for each participant. Results were extracted at  $p < 0.01$  FWE voxel-wise corrected in line with the previous study (Saetta et al, 2020). To improve visualisation, the results were displayed at  $p < 0.001$  uncorrected.

## **Task-related picture rating outside of the scanner**

Consistent with the approach taken in the study by Oddo-Sommerfeld and co-authors (2018), after the fMRI task and outside the scanner, participants were requested to assess the following attributes for each picture seen during the task-based fMRI using a VAS ranging from 0 (not at all) to 100 (very strong): *Pleasantness*: “How pleasant/unpleasant was the picture?; *Emotionality*: “How emotionally intense was the picture?” ; *Attractiveness*: “How appealing/attractive did the subjects in the pictures look?”. *Sexual Arousal*: “How sexually arousing was the picture?”.

The analysis was performed with same tools and applying the same parameter as described above (see virtual embodiment session). An ART-ANOVA examined the VAS score as a function of the between-factor Group (BID vs Control), the within-factors *Body State* (Full vs Amputated), *Person* (Self vs Other) and their interactions.

## **Clinical data and online survey in BID**

Participants provided detailed information on their desire for limb amputation, including identification of targeted limb(s), emergence timeline, and subjective likelihood of amputation within a year (rated on a 0-20 scale, definitely not – definitely will have amputation). Responses, gathered online, covered various aspects such as intensity, social interaction avoidance, duration, relief through pretending, role in sexual fantasies, self-perception in dreams, body contentment, mood, emotional state, desire prominence, suffering from BID symptoms, distress levels, and feelings of limb disownership. Questions also explored limb ownership and agency sensations.

Due to the absence of a control intervention group, involving individuals with BID undergoing either a control intervention or no intervention, the standalone data has not been extensively analysed due to its limited substantive relevance. Nevertheless, for comprehensive documentation and in a contribution to the scientific community, with the hope of ongoing data collection from other groups, the exact questions are provided in the supplementary materials, and the raw data is shared on OSF (<https://osf.io/qag6u/>).

## **Results**

### **Intensity of the desire for amputation in individuals with BID**

The group means and standard deviations for each participant for the Zurich Xenomelia Scale, ranging from a minimum score of 4 indicating the lowest severity to a maximum score



of 24 indicating the highest severity of symptoms, were as follows: *Pure Amputation Desire*:  $21.22 \pm 3.13$ ; *Erotic Attraction*:  $16.39 \pm 5.07$ ; *Pretending Behavior*:  $17.00 \pm 2.56$

### **Phenomenological experience during the embodied VR intervention**

The Wilcoxon-Mann-Whitney tests were conducted to explore the relationship between Visual Analog Scale (VAS) scores and different groups across three specific conditions: *Virtual Body Ownership*, *Virtual Body Agency* (see Figure 3, lower panels) and *Affected Leg Disownership*.

For *Virtual Body Ownership*, BID showed higher VAS scores compared to controls ( $Z = 3.46$ ,  $p = 0.001$ ), indicating a heightened sense of ownership for the virtual body.

For *Virtual Body Agency*, the Asymptotic Wilcoxon-Mann-Whitney Test indicated no significant difference between the BID and control groups ( $Z = 1.78$ ,  $p = 0.073$ ).

In the case of *Affected Leg Disownership*, the analysis showed a statistically significant difference between BID and control groups in VAS scores ( $Z = 2.34$ ,  $p = 0.012$ ).

For *Virtual Leg Ownership*, the ART-ANOVA, showed a statistically significant effect of *Group* ( $F = 15.84$ ,  $p = 0.001$ ), suggesting higher leg ownership ratings in BID compared to controls. The factor *Virtual Amputation* did not show a statistically significant effect ( $F = 0.32$ ,  $p = 0.57$ ). The interaction effect between *Group* and *Virtual Amputation* was statistically significant ( $F = 8.59$ ,  $p = 0.006$ ). Significant post-hoc tests ( $p < 0.05$ ) indicate higher leg ownership ratings in BID for the amputated virtual leg *versus* Controls for the non-virtually amputated leg (Contrast: BID, virtually amputated vs Control, non-virtually amputated; Estimate = 8.528, SE = 3.36,  $t = 2.537$ ,  $p = 0.016$ ). Furthermore, leg ownership ratings notably increase in BID *versus* the Control, for the virtually amputated leg (Contrast: BID, Amputation Consistent vs Control, Amputation Consistent: Estimate = 17.528, SE = 7.52,  $t = 2.332$ ,  $p = 0.026$ ).

For *Virtual Leg Agency*, the ART-ANOVA, showed a statistically significant effect of *Group* ( $F = 6.00$ ,  $p = 0.019$ , suggesting higher leg agency in BID compared to controls. The factor *Virtual Amputation* did not show a statistically significant effect ( $F = 2.71$ ,  $p = 0.109$ ). The interaction effect between *Group* and *Virtual Amputation* was not significant ( $F = 3.18$ ,  $p = 0.083$ ). All the results are displayed in Fig. 2.

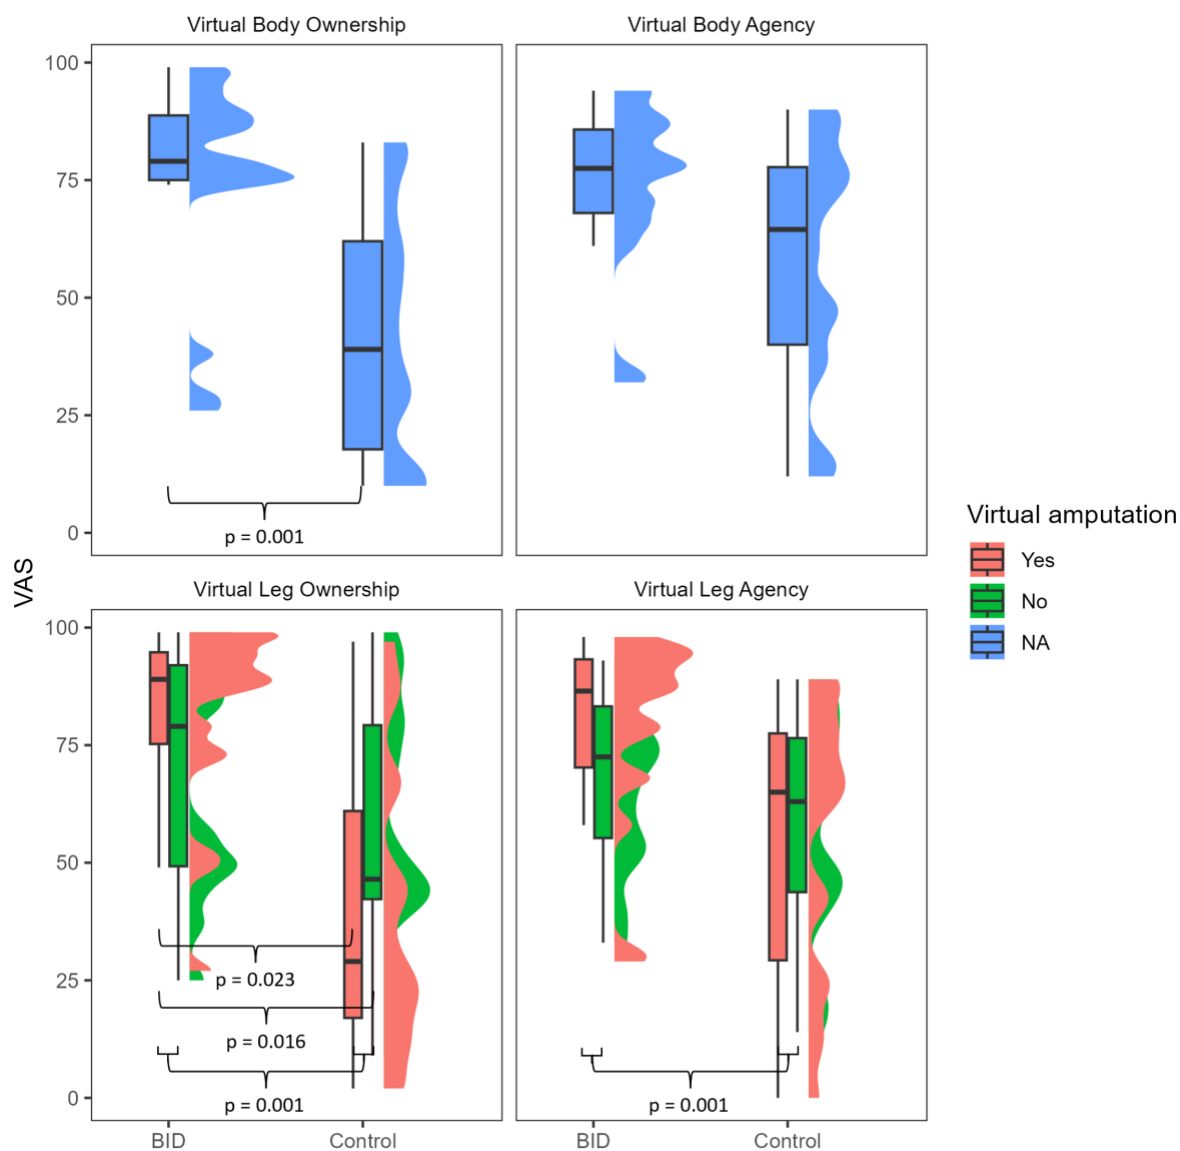

**Figure 2.** Phenomenological results of the virtual embodiment task. Boxplots and interquartile ranges are plotted.

Notably, in a debriefing performed after the VR none of the individuals with BID reported an increased desire and urge for amputation.

### Task-based fMRI

We specifically tested the a priori hypothesis that individuals with BID prior to exposure to VR, would display heightened activity in rSPL when exposed to images depicting their desired

amputated state, in contrast to control subjects. This heightened activity, was expected to decrease post-VR treatment.

To test this hypothesis, upon observing a significant main effect of *Group* (refer to supplementary materials) and a non-significant effect of *Session*, we applied the contrast BID-PreVR-Amputated > BID-PostVR-Amputated. In line with our hypothesis, significant effects were observed in a cluster encompassing the rSPL and rAG. Subsequently, effects were observed in the rSMA and another cluster positioned between the rPreCG and rPostCG. The same contrast applied to the control group (Control-PreVR-Amputated > Control-PostVR-Amputated), along with contrasts utilizing opposite signs (BID-PreVR-Amputated < BID-PostVR-Amputated and Control-PreVR-Amputated < Control-PostVR-Amputated), produced non-significant results ( $p > 0.001$  uncorrected). Detailed results can be found in Fig. 3 and Table 1a. Any additional main and interaction effects, which are not pertinent to our specific hypotheses, can be explored by accessing the spm.mat shared on the OSF (<https://osf.io/qag6u/>).

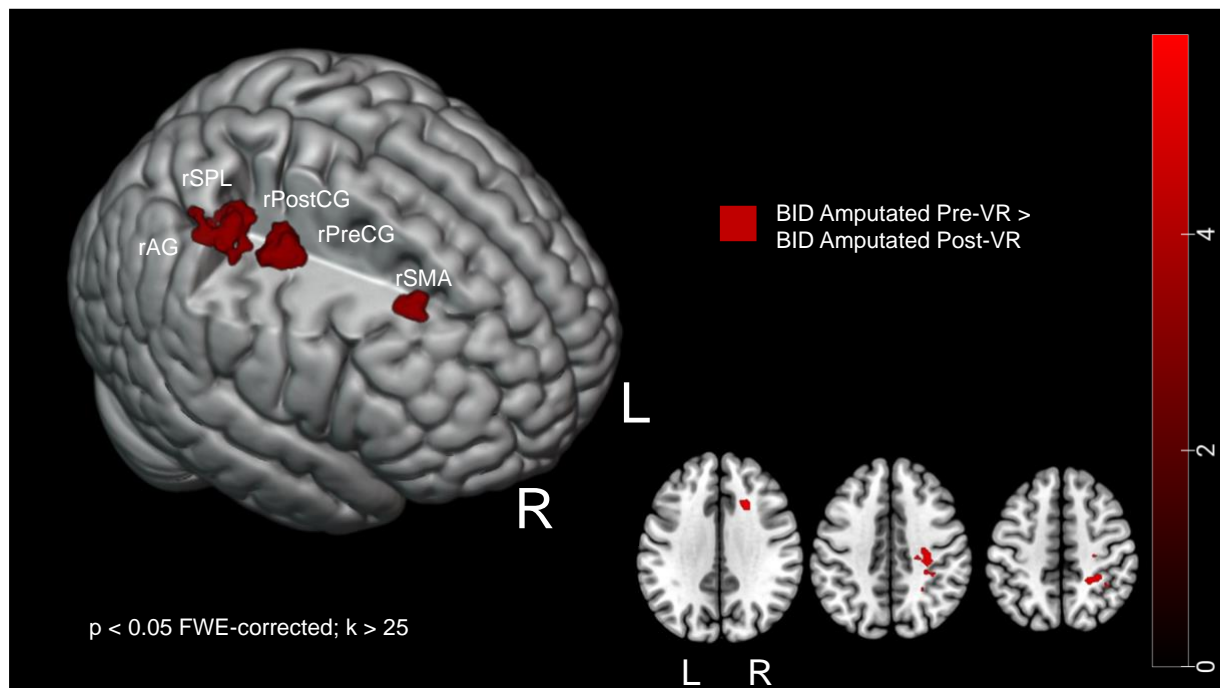

Figure 3. Task-based fMRI results. Enhanced neural patterns observed before the VR-Intervention as BID viewed themselves in their desired body state, with normalization occurring after the VR intervention. Abbreviations: rSPL (right superior parietal lobule), rAG (right angular gyrus), rPostCG (right postcentral gyrus), rPreCG (right precentral gyrus), rSMA (right supplementary motor area).

## Rs-fMRI

We hypothesized that the BID group would exhibit reduced ROI-to-ROI FC of the rSPL/rAG, visual parieto-occipital areas and areas within the limbic system in PreVR compared to Controls, that normalizes PostVR. We first observed the main effects of *Group* and *Session* (see supplementary materials). Consistent with this hypothesis, for whole brain analysis, the contrast Control > BID, PreVR > PostVR showed reduced ROI-to-ROI functional connectivity between the rAG and the following regions: the rCuneal, the rsLOC and the rCaudate. The rFP showed reduced connectivity with the rAG and the PC while the lFP showed reduced connectivity with the laMTG, and the lCaudate. Additionally, the aMTG was less functionally connected to the lPutamen. Detailed results can be found in Fig. 4 and Table 1.c. For PostVR data, the contrast BID > Control and Control > BID yielded no significant results ( $p > 0.05$ ), suggesting a normalization of those networks.

Also, in line with our hypothesis, the opposite contrast BID > Controls, PreVR > PostVR showed a normalization at PostVR of the enhanced reward-system connectivity that was observed PreVR. Specifically, this was between the lPreCG, the rAccumbens, the rSPL and the lAccumbens, and the rIFGoper and lAccumbens (see Fig. 4 and Table 1.d). Any additional

main and interaction effects can be explored by accessing the material shared on the OSF (<https://osf.io/qag6u/>).

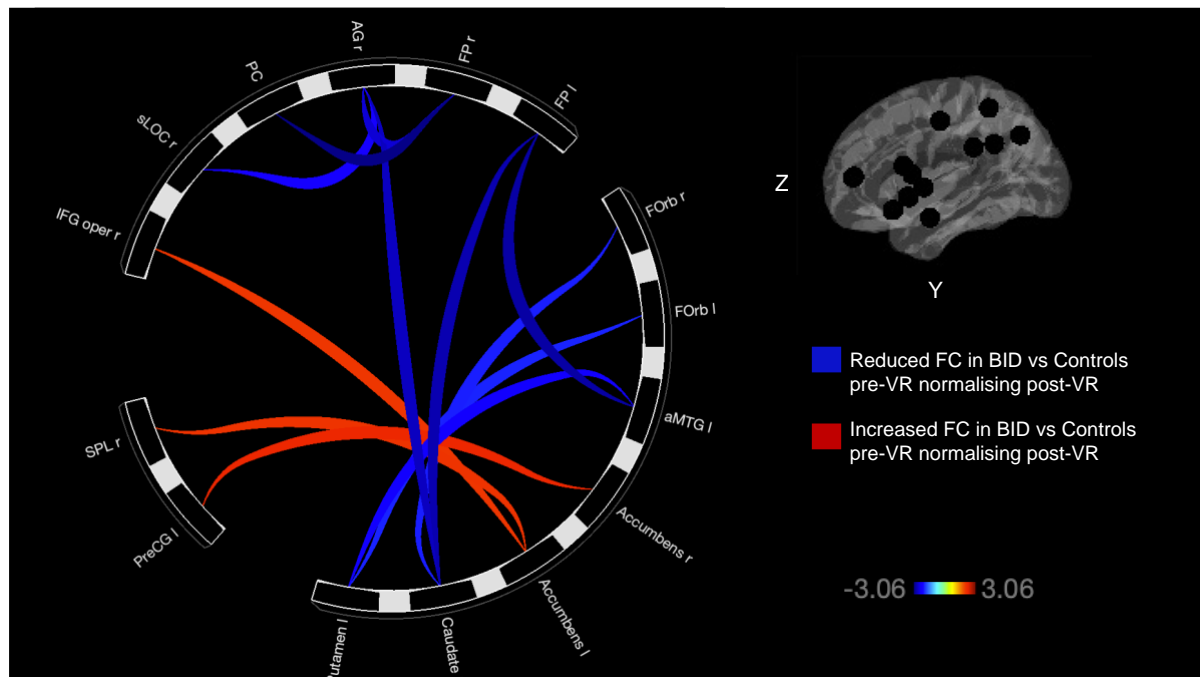

Figure 4. Resting-state fMRI results. Patterns of reduced (in blue) and increased (in red) IOI connectivity in BID compared to the control group prior to the VR intervention, with normalization occurring after the VR intervention. Abbreviations are specified in the data-analysis section.

## T1-weighted morphological data

For replication purposes, the analyses of the structural scans was expected to show lower gray matter volume in regions involved in the body image, multisensory integration, and the reward system. Consequently, the contrast was computed as Control > BID. Consistent with findings from prior research (Saetta et al., 2020) gray matter reductions in BID were observed in the rSPL, rAG, the left premotor cortex (in a cluster comprising the lPreCG and the lMidFG) and the pars orbitalis of the left inferior frontal gyrus (in a cluster comprising the lFP and lFOrb). Detailed results can be found in Figure 5 and Table 1b. The spm.mat for further exploration of the results can be found on OSF (<https://osf.io/qag6u/>).

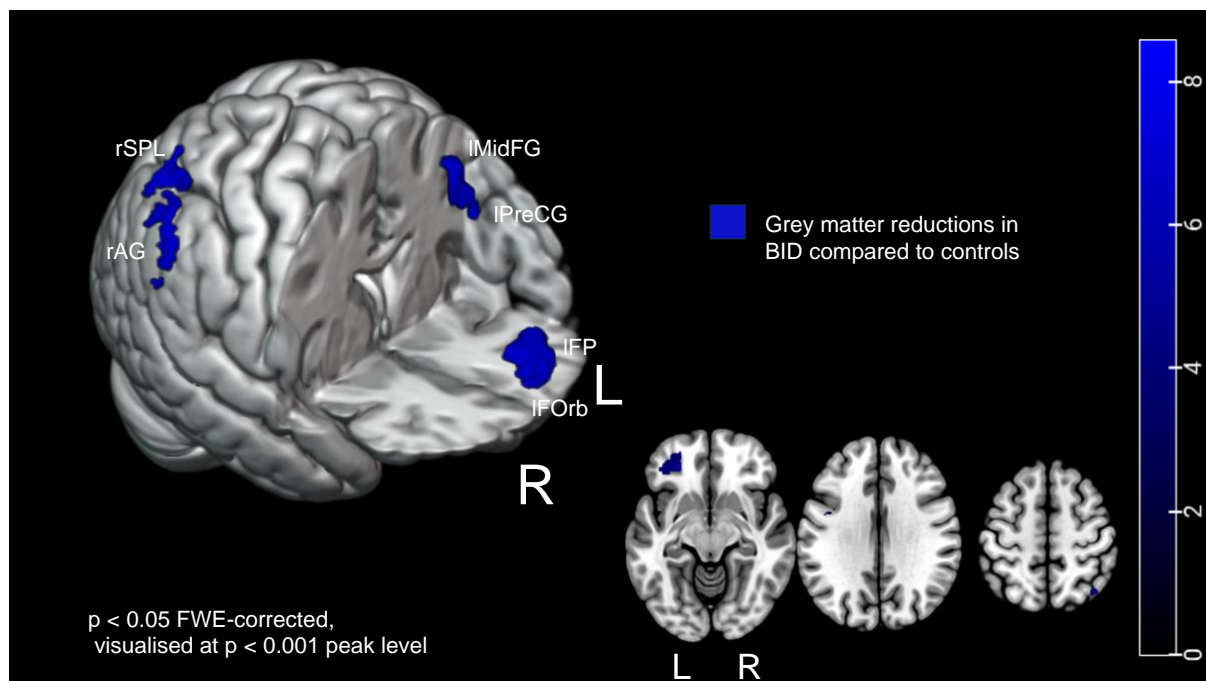

Figure 5. Gray matter reductions in BID compared to the control group. rSPL: right superior parietal lobule; rAG: right angular gyrus; lMidFG: left middle frontal gyrus; lPreCG: left precentral Gyrus; lFOrb: left frontal orbital cortex, lFP: left frontal pole

| Brain regions                                                                         | MNI coordinates |    |     |         |                  |          |    |         |
|---------------------------------------------------------------------------------------|-----------------|----|-----|---------|------------------|----------|----|---------|
|                                                                                       | Left hemisphere |    |     |         | Right hemisphere |          |    |         |
|                                                                                       | x               | y  | z   | Z-score | x                | y        | z  | Z-score |
| <b>a. Task based fMRI</b>                                                             |                 |    |     |         |                  |          |    |         |
| <i>BID Amputated Pre-VR &gt;</i>                                                      |                 |    |     |         |                  |          |    |         |
| <i>BID Amputated Post-VR</i>                                                          |                 |    |     |         |                  |          |    |         |
| Superior Parietal Lobule                                                              |                 |    |     |         | 22               | -42      | 46 | 5.82    |
| Superior Parietal Lobule                                                              |                 |    |     |         | 34               | -36      | 40 | 5.6     |
| Supplementary Motor Area                                                              |                 |    |     |         | 22               | 18       | 32 | 3.79    |
| Postcentral Gyrus                                                                     |                 |    |     |         | 32               | -26      | 42 | 5.44    |
| Precentral Gyrus                                                                      |                 |    |     |         | 24               | -24      | 44 | 5.42    |
| <b>b. Gray matter reductions in BID</b>                                               |                 |    |     |         |                  |          |    |         |
| Right Angular Gyrus                                                                   |                 |    |     |         | 38               | -64      | 54 | 5.1     |
| Inferior Orbitofrontal Gyrus                                                          | -24             | 36 | -10 | 4.97    |                  |          |    |         |
| Inferior Orbitofrontal Gyrus                                                          | -39             | 36 | -10 | 4.66    |                  |          |    |         |
| Superior Orbitofrontal Gyrus                                                          | -24             | 45 | -10 | 4.46    |                  |          |    |         |
| Precentral Gyrus                                                                      | -39             | 2  | 30  | 4.11    |                  |          |    |         |
| <b>c. Reduced ROI-to-ROI FC in BID vs Controls normalising post-VR</b>                |                 |    |     |         |                  |          |    |         |
|                                                                                       |                 |    |     |         | <b>T (34)</b>    | <b>p</b> |    |         |
| rFP (Frontal Pole Right) - PC (Cingulate Gyrus, posterior division)                   |                 |    |     |         | 3.06             | 0.004    |    |         |
| IFP (Frontal Pole Left) - laMTG (Middle Temporal Gyrus, anterior division Left)       |                 |    |     |         | 2.86             | 0.007    |    |         |
| laMTG (Middle Temporal Gyrus, anterior division Left) - lPutamen                      |                 |    |     |         | 2.34             | 0.025    |    |         |
| IFP (Frontal Pole Left) - lCaudate                                                    |                 |    |     |         | 2.79             | 0.009    |    |         |
| rFP (Frontal Pole Right) - rAG (Angular Gyrus Right)                                  |                 |    |     |         | 2.58             | 0.014    |    |         |
| rAG (Angular Gyrus Right) - lCaudate                                                  |                 |    |     |         | 2.71             | 0.011    |    |         |
| rAG (Angular Gyrus Right) - rCuneal (Cuneal Cortex Right)                             |                 |    |     |         | 2.37             | 0.020    |    |         |
| rAG (Angular Gyrus Right) - rsLOC (Lateral Occipital Cortex, superior division Right) |                 |    |     |         | 2.18             | 0.036    |    |         |
| <b>d. Increased ROI-to-ROI FC in BID vs Controls normalising post-VR</b>              |                 |    |     |         |                  |          |    |         |
| PreCG l (Precentral Gyrus Left) - Accumbens r                                         |                 |    |     |         | -2.26            | 0.030    |    |         |
| SPL r (Superior Parietal Lobule Right) - Accumbens l                                  |                 |    |     |         | -2.1             | 0.043    |    |         |
| Accumbens l - IFG oper r (Inferior Frontal Gyrus, pars opercularis Right)             |                 |    |     |         | -2.09            | 0.044    |    |         |

Table 1. Result for task-based fMRI, T1-weighted morphological data and rs-state functional connectivity

## Task-related picture rating outside of the scanner

We hypothesised that individuals with BID would rate the pictures with amputation as more emotionally gratifying, intense, attractive, and sexually arousing compared to controls.

For *Pleasantness*, the ART-ANOVA revealed a statistically significant effect of *Group* ( $F = 20.43, p < 0.001$ ). The factor *Body State* also showed a statistically significant effect ( $F = 11.72, p < 0.001$ ). The factor *Person* demonstrated a significant effect as well ( $F = 8.94, p < 0.001$ ). The two-way interaction effect between *Group* and *Body State* was found to be highly significant ( $F = 173.91789, p < 0.001$ ). Additionally, the three-way interaction effect between *Group*, *Body State*, and *Person* was also significant ( $F = 27.94, p < 0.001$ ).

For *Emotional Intensity*, a main effect was seen for the factors *Group* ( $F = 10.30, p < 0.001$ ), *Body State* ( $F = 100.36, p < 0.001$ ), and *Person* ( $F = 54.90, p < 0.001$ ). The two-way interaction effect between *Group* and *Body State* was significant ( $F = 82.92, p < 0.001$ ). Additionally, the interaction effect between *Group* and *Person* was significant ( $F = 5.27, p < 0.001$ ), and the interaction effect between *Body State* and *Person* was significant ( $F = 4.44, p = 0.036$ ). The three-way interaction effect between *Group*, *Body State*, and *Person* was also significant ( $F = 7.3354, p = 0.007$ ).

For *Appeal/Attractiveness*, the ART-ANOVA revealed a main effect of *Group* ( $F = 6.17, p = 0.018$ ) and *Person* ( $F = 24.25, p < 0.001$ ), no main effect of *Body State* ( $F = 2.89, p = 0.09$ ). The two-way interaction effect between *Group* and *Body State* was found to be highly significant ( $F = 49.79, p < 0.001$ ). The two-way interaction between *Group* and *Person*, and between *Body State* and *Person* were not significant. Additionally, the three-way interaction effect between *Group*, *Body State*, and *Person* was also significant ( $F = 6.23, p = 0.013$ ).

For *Sexual Arousal*, a main effect was observed for factors *Group* ( $F = 7.36, p = 0.01$ ), *Body State* ( $F = 41.76, p < 0.001$ ), and *Person* ( $F = 31.70, p < 0.001$ ). The two-way interaction effect between *Group* and *Body State* was highly significant ( $F = 88.82, p < 0.001$ ). Additionally, the interaction effect between *Group* and *Person* was significant ( $F = 21.48, p < 0.001$ ), as well as the interaction effect between *Body State* and *Person* ( $F = 7.69, p = 0.005$ ). The three-way interaction effect between *Group*, *Body State*, and *Person* was also significant ( $F = 19.70, p < 0.001$ ).

Results are shown in Fig 6. Post-hoc results are reported in the Supplementary Materials. Scripts and data are shared on OSF (<https://osf.io/qag6u/>).



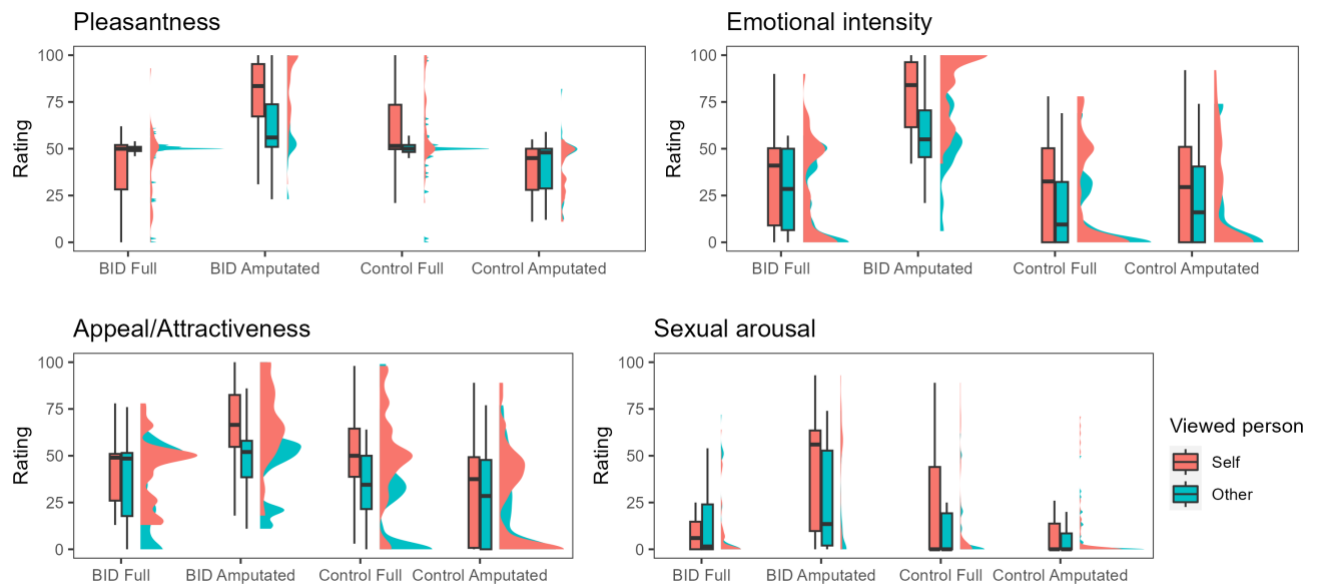

Figure 6. Results of the picture rating task. Boxplots with medians and interquartile ranges are presented.

## Discussion

In this study, we investigated how a short-term intervention based on embodiment of an amputated avatar influences neural and phenomenological underpinnings of BID. Individuals with BID often engage in pretending behaviors to align their physical body to their body image. We argue that VR might enable a more precise and safer way for such a temporary alignment.

Both BID and control groups participated in an interactive VR game where they embodied an amputated avatar, using a virtual stump to catch soap bubbles. The avatar's stump movements were synchronized with participants' actual leg movements to enhance the sense of ownership and agency (e.g., Maselli and Slater, 2013). For the BID group, the amputated body shown matched the individual's desired body state. As expected, individuals with BID compared to controls reported higher ownership ratings for the virtual amputated body. This result is in line with previous clinical explicit and implicit data which showed increased self-identification with an amputated body in BID (Ho et al., 2023; Macaуда et al., 2017). Contrary to predictions, the effect was not significant for the sense of agency. While there is a large amount of data showing altered body ownership in BID, the sense of agency has been less explored. A recent study by Scattolin et al., (2023) showed a reduced self-reported sense of agency for the affected limb in BID compared to controls, though less pronounced than the difference in the sense of ownership. This might explain the smaller between group difference in the sense of agency for

the amputated virtual avatar. Furthermore, our current data show a relatively high sense of agency for the amputated virtual body in both BID and control groups. This suggests a potentially more comprehensive and integrated nature of the sense of agency compared to ownership in healthy participants, extending beyond specific body parts and implying a holistic perception that unifies various elements of the virtual body (Tsakiris et al., 2006). These effects were consistent when participants were asked about their sense of ownership and agency for each of the virtual legs (i.e., stump *versus* full leg). Individuals with BID consistently showed significantly higher sense of ownership, particularly for the virtual stump, while there was no group difference for the non-affected, full leg. Again, this effect was not observed for the sense of agency. Between-group differences were found, with individuals with BID reporting higher ratings for the sense of agency for the legs compared to controls, though regardless of the side of virtual amputation. To summarize, our phenomenological results show that individuals with BID strongly embodied the amputated virtual avatar, reporting a high sense of ownership and agency.

The primary aim of the study was to investigate how virtual embodiment might affect previously identified alterations in task-based neural activation and resting-state functional connectivity. In task-based fMRI, the rSPL/rAG and rSMA showed enhanced activity before the VR when participants saw themselves in the desired state, which normalized after the VR exposure.

The rSPL, implicated in integrating various sensory inputs such as vision, touch, and proprioception, forms a dynamic body image that adapts as the individuals move through their environment. Consequently, individuals with BID can visually and tactilely perceive the "foreign" limb, yet it fails to seamlessly integrate into this higher-level body image (McGeoch et al., 2011). As recently demonstrated by Gandola et al., (2021), individuals with BID, when subjected to tactile stimulation on the undesired leg, exhibited hypoactivity in the rSPL. This observed hypoactivity may serve as evidence of the failure to integrate the "foreign" limb into the higher-level body image. Building on these findings and consistent with Oddo-Sommerfeld et al. (2018), we observed heightened rSPL activity when individuals with BID but *not* the controls viewed their own amputated body. This aligns with our hypothesis that the rSPL may function as a *comparator* to detect discrepancies between the current body state and the body image. In this study, we demonstrated that individuals with BID no longer showed this rSPL activity after embodying a virtual body tailored to their body image. This rSPL activity appears pronounced in individuals with BID during visual inspection of the amputated body, unlike

controls, suggesting that the body image in the rSPL calls upon their body image (Saetta et al., 2020). The body image in the brain is believed to be innate and hardwired, as demonstrated by the sensation of a limb resembling the canonical one, despite its physical absence from birth (e.g., the congenital condition referred to as amelia, Brugger et al., 2000) or its unconventional form, such as hands or feet attached directly to the trunk (e.g., phocomelia, McGeoch and Ramachandran, 2012). Further evidence supporting the innate character of the body image includes instances of individuals experiencing a phantom penis and phantom erection after surgical removal for malignancy (Crone-Munzebrock, 1951) or in male-to-female transgender individuals who report a phantom penis after surgery to reassign their genitals (Selvaggi et al., 2005). Notably, these individuals never felt their penises were part of their body image (Cohen-Kettenis and Gooren, 1999; McGeoch and Ramachandran, 2020; Ramachandran and McGeoch, 2008; Straayer, 2020). It is crucial to highlight that transgender individuals may also experience distress regarding the genitalia they are born with, like how individuals with BID may feel distress about a limb. Consistent with previous reports (Scupin et al., 2021), there is a comorbidity between BID and gender identity dysphoria, with 5 out of 18 individuals with BID in our sample exhibiting symptoms from both conditions. Our findings are compatible with the idea that both conditions may be associated with atypical activity of the rSPL; however, only future studies comparing groups of individuals with BID and controls with and without gender identity dysphoria, may provide more clarity.

In conjunction with hyperactivity of rSPL during observation of the desired body, a corresponding hyperactivity was observed in the rSMA. The rSMA is implicated in the initiation of movements, particularly those driven by internally generated plans rather than simple responses to external stimuli. Its functions encompass motor planning, sequencing of movements, and the integration of sensory information relevant to motor actions (Haggard, 2008; Zapparoli et al., 2017). Recognized for its association with the awareness and perception of self-generated movements, the rSMA contributes to the coherent sense that individuals are agents of their actions (Haggard, 2017). The sense of agency involves efferent signals and continuous monitoring of body state, with the rSMA postulated to serve as a comparator (Frith et al., 2000). In BID, a lapse in updating internal self-models during self-generated limb movement may occur, given the lack of limb anchoring to the body image (Giummarra et al., 2011). Indeed, individuals with BID, in contrast to controls, report the same perception of an actor's body motion triggering the observers' sensorimotor schema while pretending or being in a normal position (Saetta et al., 2021a). Also, our resting-state fMRI results support the

framework for the missing anchoring of multimodal limb representation to body image. Prior to VR, we observed reduced functional connectivity between rAG/rSPL and visuo-occipital areas, including lCaudate, rCuneal, and rsLOC. This aligns with our previous findings of reduced structural connectivity in the parieto-occipital network for bodily self (Saetta et al., 2022), indicating compromised visual processing of the affected limb and its integration into the body image (McGeoch et al., 2011; Saetta et al., 2020).

In experimental conditions where the undesired leg is intentionally made to fade from visual awareness (the disappearing limb trick; Stone et al., 2020) or during pretending, the alleviation of desire might occur through the adjustment of visual information about the actual body to the body image represented in the rSPL. In our study, the use of VR serves as an alternative and immersive method to resolve this discrepancy, leading to the normalisation of this altered parieto-occipital functional connectivity in the right hemisphere.

Reproducing prior results, functional connectivity alterations and subsequent normalization were observed in other brain networks, specifically the limbic and mirror motor networks, crucial for emotional processing and empathetic resonance with other mental states (Filimon et al., 2007; Kilner et al., 2009; Rizzolatti et al., 1998). Pre-VR, rAG exhibited reduced connectivity to rFP, which was also less connected to the PC. In the left hemisphere, lFP showed reduced connectivity to both lCaudate and lAMTG, structures connected via the left uncinate fasciculus which is a white matter tract also found to be altered in BID (Saetta et al., 2022). A growing body of research recognises emotions as embodied processes shaped by physiological responses and social factors (Barsalou, 2010; Bechara and Damasio, 2005). Given the emphasis on the embodied nature of emotions, defined as bodily processes instantiated in physiological and social dynamics, it is not surprising that individuals with BID, experiencing body discrepancies and alterations in the mirror network, exhibit changes in the emotional domain (Pennisi and Capodici, 2021). This alteration in emotional processing is exemplified by an excessive identification of individuals with BID' bodily self with those of individuals with amputations in experimental settings (Ho et al., 2023; Macaudo et al., 2017) or through self-reported tests (Hilti et al., 2013). It could potentially lead to an overidentification with amputated bodies (Oberholte et al., 2015), a process possibly mediated by the mirror system (Saetta et al., 2022, see also commentary by Capodici et al., 2022). Aligning with the hyperempathy hypothesis, recent studies suggest that observing amputees triggers substantial resonance in the mirror motor network among healthy individuals, particularly those with heightened empathy (Liew et al., 2013a). In healthy individuals,

repetitive exposure to amputated bodies has been shown to reduce the activity of this network, excluding the occipital cortex and the rSPL (Liew et al., 2013b). In the present study we show that in BID embodying the desired body through VR led to the normalization of these networks. Increased functional connectivity was observed in the reward system before VR, particularly in the connectivity of dopaminergic cortico-striatal tracts connecting the Accumbens to the rIFGoper, IPreCG, and as predicted, the rSPL. Our findings align with the previously formulated dopaminergic hypothesis in BID (Oddo et al., 2009; Oddo-Sommerfeld et al., 2018). Indeed, the activity of the comparator in the rSPL, and its possible deactivation through pretending but not embodied VR, may establish a reinforcing cycle increasing the connectivity to the Accumbens. This view becomes more compelling when we consider phenomenological reports where individuals with BID who engage in pretending sometimes find it difficult to cease these behaviours due to the perceived worsening of intrusive and recurring thoughts. Some individuals describe it as akin to a drug addict seeking a temporary reprieve, only for the desire to return more intensely after cessation (Pennisi and Capodici, 2021). While some individuals with BID do not engage in simulations, others do so recurrently, possibly leading to neuroplastic changes in the rSPL (Hänggi et al., 2017; Saetta et al., 2020) or resulting in potential permanent peripheral nerve damage and atrophied legs (Bensler and Paauw, 2003; Giummarra et al., 2011; Storm and Weiss, 2003). The present study indicates that VR could serve as an effective and cost-efficient therapeutic method, restoring functional connectivity in the reward system.

The activity of another key multisensory area rIFGoper has recently been linked to limb disownership and misattribution observed in somatoparaphrenia (Saetta et al., 2021b), a delusional belief prevalent among right brain-damaged patients who perceive their contralesional limbs as belonging to someone else (Gandola et al., 2012; Romano and Maravita, 2019). Despite the shared characteristic of limb disownership, a fundamental distinction between BID and somatoparaphrenia lies in their aetiology, with BID being a developmental condition and somatoparaphrenia an acquired one. In contrast to individuals with somatoparaphrenia, individuals with BID are not delusional, recognising the undesired limb as an undesirable extension of their "true" body on a representational level. Importantly, there is no misattribution of the undesired limb to someone else in BID. In somatoparaphrenia, delusional disownership is associated with a functional disconnection between rIFG and the language Broca area and left temporo-parietal junction representing the left affected hemibody (Halligan et al., 1995; Saetta et al., 2021b) In contrast, in BID, the rIFG is hyperconnected to

the nucleus accumbens, possibly reinforcing the desire for amputation without misattribution. Normalizing this connectivity through VR may alleviate the desire for amputation in individuals with BID.

Another objective of the current study was to replicate and enhance the robustness of previously identified structural alterations in BID (Blom et al., 2016; Hilti et al., 2013; Saetta et al., 2020). In a distinct and largely independent sample of individuals with BID compared to controls, we observed gray matter reductions in precisely the same areas identified in Saetta et al., (2020), namely rSPL/rAG, as well as in other regions associated with mirror neurons (i.e., the lMidFG, the lPreCG) and regions of the limbic and reward systems (the lOrb, the lFP). This finding is noteworthy, considering that unlike the previous study, which exclusively recruited participants with a left leg amputation, the present study included individuals with right or left leg amputation desire. This difference may explain why we did not find functional connectivity or activity alterations in the right paracentral lobule, which is the region associated with the sensorimotor representation of the left leg. However, these results provide valuable information, suggesting that the engagement of the same brain region in BID, particularly the rSPL, may not significantly depend on the laterality of the affected leg.

Additionally, replicating the findings of Oddo-Sommerfeld et al. (2018), we showed that individuals with BID consistently rated pictures depicting their desired body state (that of an amputee) as more pleasant, intense, attractive, and sexually arousing compared to pictures of their undesired body state (real body). In contrast, control subjects rated pictures of their desired body state (real body) as more pleasant, intense, and attractive, without the heightened sexual arousal associated with the amputee body state. The association between the desire for amputation, the mental imagery of an amputee, or observing an amputee, and sexual arousal in most individuals with BID is a well-documented phenomenon (Blom et al., 2017; Brugger et al., 2016). Additionally, existing literature suggests that the body image in the brain can influence sexual preferences for bodies aligned with the individual's body image (Ramachandran et al., 2009). Also, the clear double dissociation between BID and control groups underscores the distinct preferences of the two groups for markedly different body states. The presence of such a double dissociation may open the possibility for the development of a new neuropsychological clinical test to differentiate between individuals with BID and controls based on these ratings. Future validation of such neuropsychological tests is warranted.

Our study is subject to several limitations. Firstly, the relatively small sample size is a consequence of the rarity and confidentiality surrounding the disorder. Despite these

challenges, our sample of  $n = 18$  is currently the most substantial in the existing literature, achieved through years of personal contacts and the financial support required to facilitate participants' involvement from various locations worldwide. We hope that our separate data descriptor contribution will inspire other researchers to expand this dataset by including additional participants.

Furthermore, we refrained from conducting correlation analyses in this study. This decision was made because the presentation of data analysis from the current dataset was already extensive, and correlation analyses with a small sample size could potentially yield misleading results. Additionally, our Task-based fMRI analysis did not reveal a three-way interaction (*Group by Session by Body State*), possibly due to the limited number of participants in our design matrix containing eight blocks. Nevertheless, hypothesis-based contrasts yielded results in expected brain regions, even after conducting whole-brain analyses and with a conservative statistical threshold ( $p < 0.05$  FWE voxel-wise corrected,  $k > 25$ ).

In conclusion, the present studies demonstrate the efficacy of VR as a therapeutic tool for BID, with the advantage of normalizing neurodivergent patterns in the bodily self, mirror, and limbic system networks characteristic of the condition.

It is crucial to note that the consideration of body image as innate raises the question of elective therapeutic approaches. Modifying the presumably innate body image, given its strongly founded genetic component, seems unrealistic. An alternative strategy could involve structural changes to the body, such as post-amputation, where surveys suggest markedly increased scores on quality-of-life assessments (Blom et al., 2012). However, this option is not without challenges and imposes a burden on both the health system and individuals, as post-amputation, phantom limb sensations, often painful, may occur (Noll and Kasten, 2022) . The alternative strategy of pretending, as described above, comes with multiple adverse consequences. A safer and more promising method appears to be VR, which does not require direct supervision from a medical or psychological professional, can be performed from home, and is affordable. Moreover, as demonstrated by this study, VR normalized altered patterns in the reward systems, suggesting it might be less addictive than engaging in pretending. Importantly, none of our participants reported an intensified desire for amputation after VR, in contrast to the observations during pretending. However, only clinical trials and longitudinal interventions that compare individuals with BID engaging in pretending with those using VR can provide a definitive answer to this question.

An important consideration is the therapeutic plan, including the optimal frequency of exposure and whether regular VR practice could not only impact functional patterns, as indicated by this study, but also influence structural connectivity thus determining a long-term stabilisation of those effects (May, 2011).

Despite these unanswered questions, the positive phenomenological experiences reported by participants and the observed effect of the VR in the brain are encouraging. In conclusion, the potential of this study extends beyond BID, as VR methods could be applied to various conditions affecting the bodily self. Ultimately, this study highlights how the implementation of VR aids in understanding what many take for granted—the seamless unity of the experience of body and self.

## **Acknowledgment**

GS, YP, JH, BL were funded by the Swiss National Science Foundation (grant number: PP00P1\_202674), and GS and BL by the European Commission's Horizon Europe Program through the INTELLIMAN project (<https://intelliman-project.eu/>, HORIZON-CL4-Digital-Emerging, grant number: 101070136). KR is funded by Health Research Board Ireland grant HRB-EIA-2019-003. We would like to thank Jannick Mauron and Noah Rischert for their valuable contributions as research assistants. Special thanks to the individuals with BID, who showed significant effort in traveling to Zurich from different locations of the world and committing to lengthy testing. We also would like to thank the control group for their participation.

## **Authors contribution:**

**Gianluca Saetta:** Funding acquisition, Conceptualization, Methodology, Investigation, Data curation, Project administration, Formal analysis, Writing – Original draft; **Yannik Peter:** Investigation, Data curation, Project administration, Formal analysis, Writing – Reviewing and Editing. **Kathy Ruddy:** Supervision, Writing – Reviewing and Editing; **Jasmine Ho.,** Methodology, Writing – Reviewing and Editing; **Roger Luechinger:** Investigation, Data curation, Writing – Reviewing and Editing; **Lars Michels:** Methodology, Project administration, Supervision, Writing – Reviewing and Editing; **Bigna Lenggenhager:** Funding acquisition, Conceptualization Methodology, Project administration, Supervision, Writing – Original Draft & Reviewing and Editing



## Conflicts of interest

The authors declare no conflicts of interest.

## REFERENCES

- Aoyama A, Krummenacher P, Palla A, Hilti LM, Brugger P. 2012. Impaired Spatial-Temporal Integration of Touch in Xenomelia (Body Integrity Identity Disorder). *Spat Cogn Comput* **12**:96–110. doi:10.1080/13875868.2011.603773
- Barsalou LW. 2010. Grounded cognition: past, present, and future. *Top Cogn Sci* **2**:716–724. doi:10.1111/j.1756-8765.2010.01115.x
- Bechara A, Damasio AR. 2005. The somatic marker hypothesis: A neural theory of economic decision. *Games Econ Behav*, Special Issue on Neuroeconomics **52**:336–372. doi:10.1016/j.geb.2004.06.010
- Benjamini Y, Hochberg Y. 1995. Controlling the False Discovery Rate: A Practical and Powerful Approach to Multiple Testing. *J R Stat Soc Ser B Methodol* **57**:289–300.
- Bensler JM, Paauw DS. 2003. Apotemnophilia masquerading as medical morbidity.(Case report). *South Med J* **96**:674–677.
- Blom RM, van der Wal SJ, Vulink NC, Denys D. 2017. Role of Sexuality in Body Integrity Identity Disorder (BIID): A Cross-Sectional Internet-Based Survey Study. *J Sex Med* **14**:1028–1035. doi:10.1016/j.jsxm.2017.06.004
- Blom RM, Wingen GA van, Wal SJ van der, Luigjes J, Dijk MT van, Scholte HS, Denys D. 2016. The Desire for Amputation or Paralyzation: Evidence for Structural Brain Anomalies in Body Integrity Identity Disorder (BIID). *PLOS ONE* **11**:e0165789. doi:10.1371/journal.pone.0165789
- Bolt E, Ho JT, Roel Lesur M, Soutschek A, Tobler PN, Lenggenhager B. 2021. Effects of a virtual gender swap on social and temporal decision-making. *Sci Rep* **11**:15376. doi:10.1038/s41598-021-94869-z
- Bottini G, Brugger P, Sedda A. 2015. Is the desire for amputation related to disturbed emotion processing? A multiple case study analysis in BIID. *Neurocase* **21**:394–402. doi:10.1080/13554794.2014.902969
- Brugger P, Christen M, Jellestad L, Hänggi J. 2016. Limb amputation and other disability desires as a medical condition. *Lancet Psychiatry* **3**:1176–1186. doi:10.1016/S2215-0366(16)30265-6
- Brugger P, Kollias SS, Müri RM, Crelier G, Hepp-Reymond MC, Regard M. 2000. Beyond re-remembering: phantom sensations of congenitally absent limbs. *Proc Natl Acad Sci U S A* **97**:6167–6172. doi:10.1073/pnas.100510697
- Brugger P, Lenggenhager B, Giummarra M. 2013. Xenomelia: A Social Neuroscience View of Altered Bodily Self-Consciousness. *Front Psychol* **4**.
- Capodici A, Pennisi A, Rizzo G, Falzone A, Vicario CM. 2023. Interoceptive and Affective Alterations in Body Integrity Dysphoria: An Online Self-Reporting Study. *Psychopathology* 1–9. doi:10.1159/000532076
- Capodici A, Rizzo G, Vicario CM, Pennisi A. 2022. Deepening the desire for disability: A commentary on Saetta et al. (2022). *Cortex J Devoted Study Nerv Syst Behav* **157**:327–333. doi:10.1016/j.cortex.2022.06.001
- Chakraborty S, Saetta G, Simon C, Lenggenhager B, Ruddy K. 2021. Could Brain–Computer Interface Be a New Therapeutic Approach for Body Integrity Dysphoria? *Front Hum Neurosci* **15**:433. doi:10.3389/fnhum.2021.699830

- Cohen-Kettenis PT, Gooren LJG. 1999. Transsexualism: A review of etiology, diagnosis and treatment. *J Psychosom Res* **46**:315–333. doi:10.1016/S0022-3999(98)00085-3
- Crone-Munzbrock A. 1951. [Phantom sensation after amputation of the penis]. *Z Urol* **44**:819–822.
- Desikan RS, Ségonne F, Fischl B, Quinn BT, Dickerson BC, Blacker D, Buckner RL, Dale AM, Maguire RP, Hyman BT, Albert MS, Killiany RJ. 2006. An automated labeling system for subdividing the human cerebral cortex on MRI scans into gyral based regions of interest. *NeuroImage* **31**:968–980. doi:10.1016/j.neuroimage.2006.01.021
- Dijkerman C, Lenggenhager B. 2018. The body and cognition: The relation between body representations and higher level cognitive and social processes. *Cortex, Special Section: The body and cognition: the relation between body representations and higher level cognitive and social processes* **104**:133–139. doi:10.1016/j.cortex.2018.06.001
- Filimon F, Nelson JD, Hagler DJ, Sereno MI. 2007. Human cortical representations for reaching: Mirror neurons for execution, observation, and imagery. *NeuroImage* **37**:1315–1328. doi:10.1016/j.neuroimage.2007.06.008
- First MB. 2005. Desire for amputation of a limb: paraphilia, psychosis, or a new type of identity disorder. *Psychol Med* **35**:919–928. doi:10.1017/s0033291704003320
- First MB, Fisher CE. 2012. Body integrity identity disorder: the persistent desire to acquire a physical disability. *Psychopathology* **45**:3–14. doi:10.1159/000330503
- Fornaro S, Patrikelis P, Lucci G. 2021. When having a limb means feeling overcomplete. Xenomelia, the chronic sense of disownership and the right parietal lobe hypothesis. *Laterality* **26**:564–583.
- Frith CD, Blakemore S-J, Wolpert DM. 2000. Abnormalities in the awareness and control of action. *Philos Trans R Soc Lond B Biol Sci* **355**:1771–1788. doi:10.1098/rstb.2000.0734
- Gandola M, Invernizzi P, Sedda A, Ferrè ER, Sterzi R, Sberna M, Paulesu E, Bottini G. 2012. An anatomical account of somatoparaphrenia. *Cortex J Devoted Study Nerv Syst Behav* **48**:1165–1178. doi:10.1016/j.cortex.2011.06.012
- Gandola M, Zapparoli L, Saetta G, Reverberi C, Salvato G, Squarza SAC, Invernizzi P, Sberna M, Brugger P, Bottini G, Paulesu E. 2021. Brain Abnormalities in Individuals with a Desire for a Healthy Limb Amputation: Somatosensory, Motoric or Both? A Task-Based fMRI Verdict. *Brain Sci* **11**:1248. doi:10.3390/brainsci11091248
- Giummarra MJ, Bradshaw JL, Nicholls MER, Hilti LM, Brugger P. 2011. Body integrity identity disorder: deranged body processing, right fronto-parietal dysfunction, and phenomenological experience of body incongruity. *Neuropsychol Rev* **21**:320–333. doi:10.1007/s11065-011-9184-8
- Haggard P. 2017. Sense of agency in the human brain. *Nat Rev Neurosci* **18**:196–207. doi:10.1038/nrn.2017.14
- Haggard P. 2008. Human volition: towards a neuroscience of will. *Nat Rev Neurosci* **9**:934–946. doi:10.1038/nrn2497
- Halligan PW, Marshall JC, Wade DT. 1995. Unilateral Somatoparaphrenia After Right Hemisphere Stroke: A Case Description. *Cortex* **31**:173–182. doi:10.1016/S0010-9452(13)80115-3
- Hänggi J, Vitacco DA, Hilti LM, Luechinger R, Kraemer B, Brugger P. 2017. Structural and functional hyperconnectivity within the sensorimotor system in xenomelia. *Brain Behav* **7**:e00657. doi:10.1002/brb3.657
- Hilti LM, Hänggi J, Vitacco DA, Kraemer B, Palla A, Luechinger R, Jäncke L, Brugger P. 2013. The desire for healthy limb amputation: structural brain correlates and clinical features of xenomelia. *Brain* **136**:318–329. doi:10.1093/brain/aws316

- Ho JT, Saetta G, Lenggenhager B. 2023. Influence of bodily states on cognition: A web-based study in individuals with body integrity dysphoria. *J Psychiatr Res* **159**:66–75. doi:10.1016/j.jpsychires.2023.01.020
- Jafri MJ, Pearlson GD, Stevens M, Calhoun VD. 2008. A Method for Functional Network Connectivity Among Spatially Independent Resting-State Components in Schizophrenia. *NeuroImage* **39**:1666–1681. doi:10.1016/j.neuroimage.2007.11.001
- Kilner JM, Neal A, Weiskopf N, Friston KJ, Frith CD. 2009. Evidence of Mirror Neurons in Human Inferior Frontal Gyrus. *J Neurosci* **29**:10153–10159. doi:10.1523/JNEUROSCI.2668-09.2009
- Leong SC, Tang YM, Toh FM, Fong KNK. 2022. Examining the effectiveness of virtual, augmented, and mixed reality (VAMR) therapy for upper limb recovery and activities of daily living in stroke patients: a systematic review and meta-analysis. *J NeuroEngineering Rehabil* **19**:93. doi:10.1186/s12984-022-01071-x
- Liew S-L, Han S, Aziz-Zadeh L. 2011. Familiarity modulates mirror neuron and mentalizing regions during intention understanding. *Hum Brain Mapp* **32**:1986–1997. doi:10.1002/hbm.21164
- Liew S-L, Sheng T, Aziz-Zadeh L. 2013a. Experience with an amputee modulates one’s own sensorimotor response during action observation. *NeuroImage* **69**:138–145. doi:10.1016/j.neuroimage.2012.12.028
- Liew S-L, Sheng T, Margetis J, Aziz-Zadeh L. 2013b. Both novelty and expertise increase action observation network activity. *Front Hum Neurosci* **7**.
- Longo MR. 2020. Body Image: Neural Basis of ‘Negative’ Phantom Limbs. *Curr Biol* **30**:R644–R646. doi:10.1016/j.cub.2020.04.006
- Longo MR. 2015. Implicit and explicit body representations. *Eur Psychol* **20**:6–15. doi:10.1027/1016-9040/a000198
- Macauda G, Bekrater-Bodmann R, Brugger P, Lenggenhager B. 2017. When less is more - Implicit preference for incomplete bodies in xenomelia. *J Psychiatr Res* **84**:249–255. doi:10.1016/j.jpsychires.2016.09.019
- Maselli A, Slater M. 2013. The building blocks of the full body ownership illusion. *Front Hum Neurosci* **7**.
- McGeoch PD, Brang D, Song T, Lee RR, Huang M, Ramachandran VS. 2011. Xenomelia: a new right parietal lobe syndrome. *J Neurol Neurosurg Psychiatry* **82**:1314–1319. doi:10.1136/jnnp-2011-300224
- McGeoch PD, Ramachandran VS. 2020. Phantom Phenomena—An Introduction to “Phantom Penis: Extrapolating Neuroscience and Employing Imagination for Trans Male Sexual Embodiment.” *Stud Gend Sex* **21**:247–250. doi:10.1080/15240657.2020.1857529
- McGeoch PD, Ramachandran VS. 2012. The appearance of new phantom fingers post-amputation in a phocomelus. *Neurocase* **18**:95–97. doi:10.1080/13554794.2011.556128
- Morfino F, Whitfield-Gabrieli S, Nieto-Castañón A. 2023. Functional connectivity MRI quality control procedures in CONN. *Front Neurosci* **17**:1092125. doi:10.3389/fnins.2023.1092125
- Nieto-Castanon A. 2020. Handbook of functional connectivity magnetic resonance imaging methods in CONN. Hilbert Press.
- Noll S, Kasten E. 2022. Body integrity identity disorder (BIID): how satisfied are successful wannabes. *Psychol Behav Sci* **3**:222–232.
- Oberholte C, Schnell T, Kasten E. 2015. The role of specific experiences in childhood and youth in the development of body integrity identity disorder (BIID). *Am J Appl Psychol* **4**:1–8.

- Oddo S, Thiel A, Skoruppa S, Klinger D, Steis N, Markowitsch HJ, Stirn A. 2009. Neurobiological and psychological aspects of BIID—an integrative approach. *Body Integr Identity Disord Psychol Neurobiol Ethical Leg Asp* 238–245.
- Oddo-Sommerfeld S, Hänggi J, Coletta L, Skoruppa S, Thiel A, Stirn AV. 2018. Brain activity elicited by viewing pictures of the own virtually amputated body predicts xenomelia. *Neuropsychologia* **108**:135–146. doi:10.1016/j.neuropsychologia.2017.11.025
- Pennisi A, Capodici A. 2021. Bodies that love themselves and bodies that hate themselves: the role of lived experience in body integrity dysphoria. *Psychopathology and the Mind: What Mental Disorders Can Tell Us about Our Minds*. Routledge. pp. 222–252.
- Ramachandran VS, Brang D, McGeoch PD, Rosar W. 2009. Sexual and food preference in apotemnophilia and anorexia: interactions between “beliefs” and “needs” regulated by two-way connections between body image and limbic structures. *Perception* **38**:775–777. doi:10.1068/p6350
- Ramachandran VS, McGeoch PD. 2008. Phantom Penises In Transsexuals. *J Conscious Stud* **15**:5–16.
- Rizzolatti G, Luppino G, Matelli M. 1998. The organization of the cortical motor system: new concepts. *Electroencephalogr Clin Neurophysiol* **106**:283–296. doi:10.1016/S0013-4694(98)00022-4
- Romano D, Maravita A. 2019. The dynamic nature of the sense of ownership after brain injury. Clues from asomatognosia and somatoparaphrenia. *Neuropsychologia* **132**:107119. doi:10.1016/j.neuropsychologia.2019.107119
- Saetta G, Hänggi J, Gandola M, Zapparoli L, Salvato G, Berlinger M, Sberna M, Paulesu E, Bottini G, Brugger P. 2020. Neural correlates of body integrity dysphoria. *Curr Biol* **30**:2191-2195. e3.
- Saetta G, Ho JT, Bekrater-Bodmann R, Brugger P, Dijkerman CH, Lenggenhager B. 2021a. Limb apparent motion perception: Modification by tDCS, and clinically or experimentally altered bodily states. *Neuropsychologia* **162**:108032. doi:10.1016/j.neuropsychologia.2021.108032
- Saetta G, Michels L, Brugger P. 2021b. Where in the Brain is “the Other’s” Hand? Mapping Dysfunctional Neural Networks in Somatoparaphrenia. *Neuroscience* **476**:21–33. doi:10.1016/j.neuroscience.2021.09.007
- Saetta G, Ruddy K, Zapparoli L, Gandola M, Salvato G, Sberna M, Bottini G, Brugger P, Lenggenhager B. 2022. White matter abnormalities in the amputation variant of body integrity dysphoria. *Cortex* **151**:272–280. doi:10.1016/j.cortex.2022.03.011
- Scarpina F, Serino S, Keizer A, Chirico A, Scacchi M, Castelnuovo G, Mauro A, Riva G. 2019. The Effect of a Virtual-Reality Full-Body Illusion on Body Representation in Obesity. *J Clin Med* **8**:1330. doi:10.3390/jcm8091330
- Scattolin M, Panasiti MS, Ho JT, Lenggenhager B, Aglioti SM. 2023. Ownership of the affected leg is further reduced following deceptive behaviors in body integrity dysphoria. *iScience* **26**. doi:10.1016/j.isci.2023.107551
- Scupin C, Schnell T, Kasten E. 2021. How Defined Is Gender Identity in People with Body Integrity Dysphoria? *Adv Mind Body Med* **35**:17–32.
- Selvaggi G, Ceulemans P, De Cuyper G, VanLanduyt K, Blondeel P, Hamdi M, Bowman C, Monstrey S. 2005. Gender Identity Disorder: General Overview and Surgical Treatment for Vaginoplasty in Male-to-Female Transsexuals. *Plast Reconstr Surg* **116**:135e. doi:10.1097/01.prs.0000185999.71439.06
- Stoet G. 2010. PsyToolkit: A software package for programming psychological experiments using Linux. *Behav Res Methods* **42**:1096–1104. doi:10.3758/BRM.42.4.1096

- Stone KD, Bullock F, Keizer A, Dijkerman HC. 2018. The disappearing limb trick and the role of sensory suggestibility in illusion experience. *Neuropsychologia* **117**:418–427.
- Storm S, Weiss MD. 2003. Self-inflicted tourniquet paralysis mimicking acute demyelinating polyneuropathy. *Muscle Nerve Off J Am Assoc Electrodiagn Med* **27**:631–635.
- Straayer C. 2020. Phantom Penis: Extrapolating Neuroscience and Employing Imagination for Trans Male Sexual Embodiment. *Stud Gen Sex* **21**:251–279.  
doi:10.1080/15240657.2020.1842075
- Tacikowski P, Fust J, Ehrsson HH. 2020. Fluidity of gender identity induced by illusory body-sex change. *Sci Rep* **10**:14385. doi:10.1038/s41598-020-71467-z
- Tsakiris M, Prabhu G, Haggard P. 2006. Having a body versus moving your body: How agency structures body-ownership. *Conscious Cogn* **15**:423–432.  
doi:10.1016/j.concog.2005.09.004
- Turbyne C, Koning P de, Zantvoord J, Denys D. 2021. Body integrity identity disorder using augmented reality: a symptom reduction study. *BMJ Case Rep CP* **14**:e238554.  
doi:10.1136/bcr-2020-238554
- Wobbrock JO, Findlater L, Gergle D, Higgins JJ. 2011. The aligned rank transform for nonparametric factorial analyses using only anova procedures Proceedings of the SIGCHI Conference on Human Factors in Computing Systems, CHI '11. New York, NY, USA: Association for Computing Machinery. pp. 143–146.  
doi:10.1145/1978942.1978963
- Zapparoli L, Seghezzi S, Paulesu E. 2017. The What, the When, and the Whether of Intentional Action in the Brain: A Meta-Analytical Review. *Front Hum Neurosci* **11**.
